# Supplementary material for: One pot synthesis of ultrathin boron nitride nanosheet-supported nanoscale zerovalent iron for rapid debromination of polybrominated diphenyl ethers
Source: Royal Society of Chemistry journal article supplement (doi:10.1039/c3ta10282c), 2013-01-01
Supplement: c3ta10282c.pdf [file c3ta10282c.pdf]

## Electronic Supplementary Information for One pot synthesis of nZVI/BNNs for rapid debromination of polybrominated diphenyl ethers

Liancheng Wang<sup>a, c†\*</sup>, Shou-Qing Ni<sup>b, c†\*</sup>, Chunli Guo<sup>c</sup> and Yitai Qian<sup>c</sup>

<sup>a</sup> Key Laboratory of Carbon Materials, Institute of Coal Chemistry, Chinese Academy of Sciences, Taiyuan, 030001, China. wanglc@sxicc.ac.cn (Liancheng Wang) Fax: +86 351 4041153, Tel.: +86 351 4063121.

<sup>b</sup> School of Environmental Science and Technology, Shandong University, Jinan 250100, China. sqni@sdu.edu.cn (Shou-Qing Ni) Fax: +86 531 88366280, Tel.: +86 531 88365017

<sup>c</sup> Key Laboratory for Colloid & Interface Chemistry of Education Ministry, School of Chemistry and Chemical Engineering, Shandong University, Jinan 250100, China.

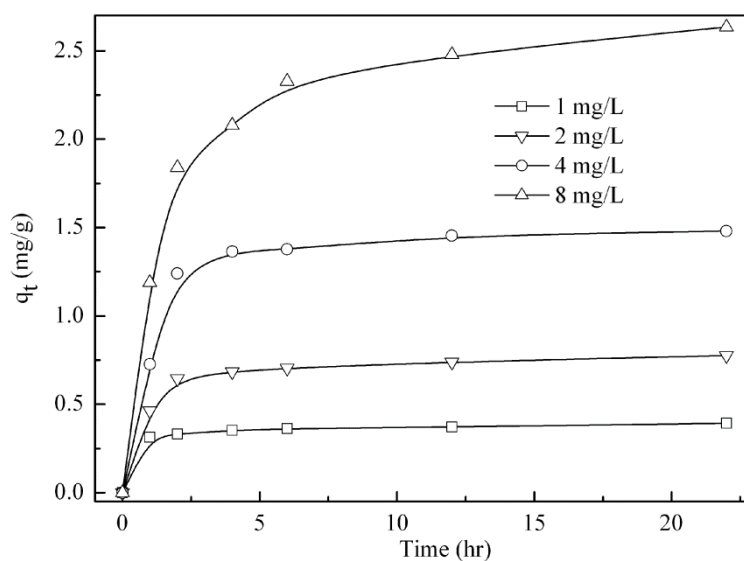

Fig. SI 1. Trends of removal rates at different DBDE concentrations.

\* Corresponding author. Tel.: +86; fax: +86.

E-mail address: wanglc@sxicc.ac.cn (Wang L. C.), sqni@sdu.edu.cn (Ni S. Q.)

† These authors made equal contributions to this work and share the first authorship.

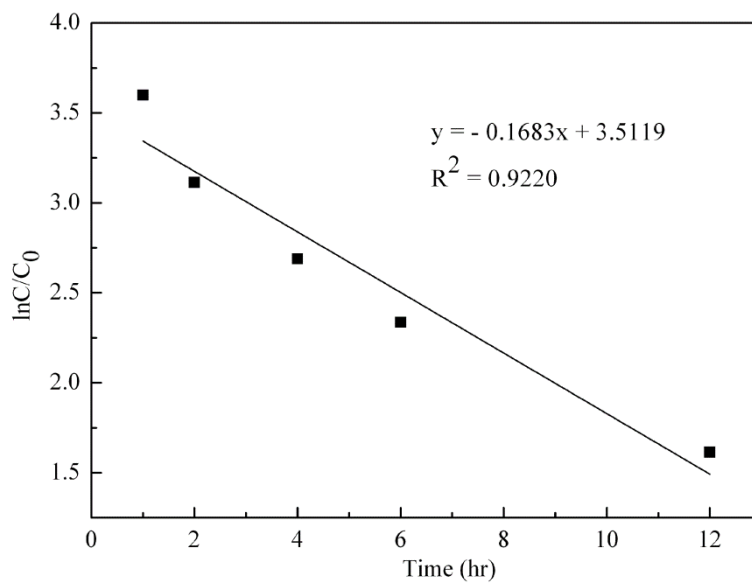

**Fig. SI 2.** Pseudo-first-order kinetic plots for the disappearance of DBDE at higher Fe dosage (5.0 g/L).

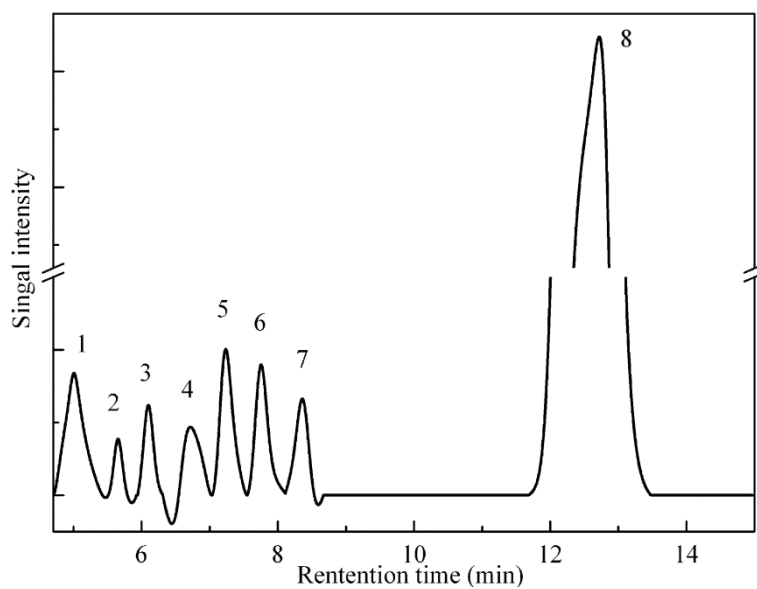

**Fig. SI 3.** Chromatograms of PBDEs standard solution containing a mixture of eight PBDE congeners.

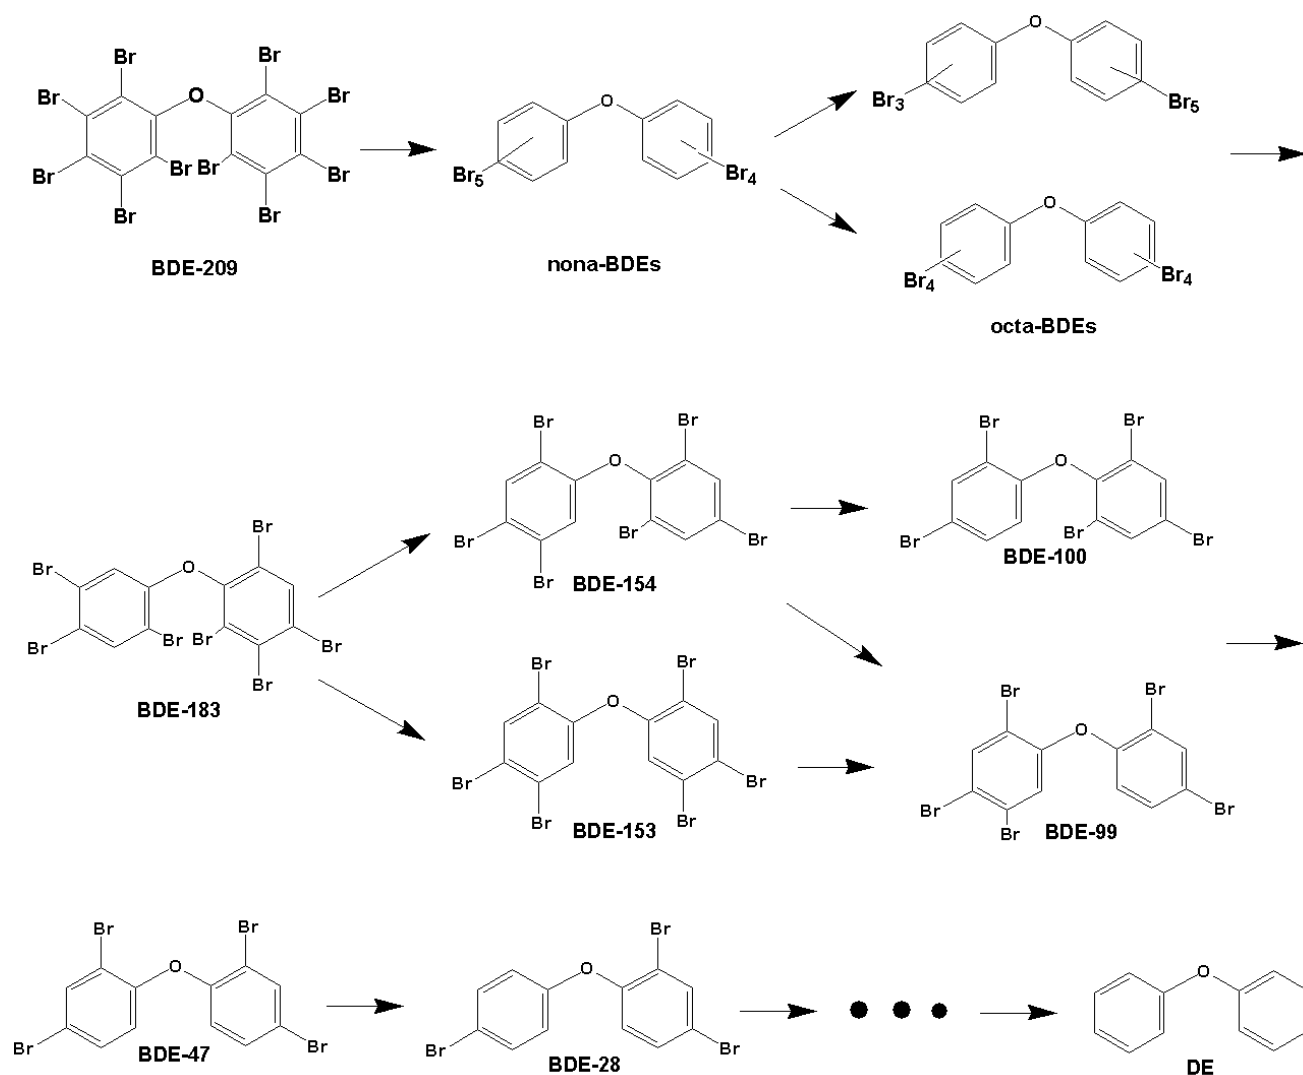

**Fig. SI 4.** Proposed debromination pathways of DBDE by nZVI/BNNs.

**Table SI1** PBDE Standards in Order of Elution

| Peak # | Component                                        | IUPAC # | Purity (%) | Manufacturer      | Relative retention time (min) |
|--------|--------------------------------------------------|---------|------------|-------------------|-------------------------------|
| 1      | 2,4,4'-Tribromodiphenyl ether                    | BDE-28  | 99.3       | AccuStandard Inc. | 5.0                           |
| 2      | 2,2',4,4'-Tetrabromodiphenyl ether               | BDE-47  | 100        | AccuStandard Inc. | 5.7                           |
| 3      | 2,2',4,4',6-Pentabromodiphenyl ether             | BDE-100 | 100        | AccuStandard Inc. | 6.1                           |
| 4      | 2,2',4,4',5-Pentabromodiphenyl ether             | BDE-99  | 99.2       | AccuStandard Inc. | 6.7                           |
| 5      | 2,2',4,4',5,6'-Hexabromodiphenyl ether           | BDE-154 | 100        | AccuStandard Inc. | 7.2                           |
| 6      | 2,2',4,4',5,5'-Hexabromodiphenyl ether           | BDE-153 | 100        | AccuStandard Inc. | 7.8                           |
| 7      | 2,2',3,4,4',5',6-Heptabromodiphenyl ether        | BDE-183 | 100        | AccuStandard Inc. | 8.3                           |
| 8      | 2,2',3,3',4,4',5,5',6,6'-Decabromodiphenyl ether | BDE-209 | 98.3       | AccuStandard Inc. | 12.7                          |
